# Supplementary material
Source: Research Square preprint supplement (doi:10.21203/rs.3.rs-9960173/v1)
Supplement: Supplementary file 1 [file 2ed8a527e162101299882259.docx]

SUPPORTING INFORMATION

**Techno-economic assessment of nanocellulose pilot-scale production using lignocellulosic waste from the Costa Rican pineapple industry**

Mauricio Rojas-Álvarez1, Felipe Orozco2, Bárbara Cristina Miranda-Morales1, Roberto Coto Rojas1, José Roberto Vega-Baudrit2,3*

1. Escuela de Ingeniería Química, Universidad de Costa Rica, San José, Costa Rica.

2. National Nanotechnology Laboratory LANOTEC CENAT CONARE, San José, Costa Rica

3. Escuela de Química, Universidad Nacional, Heredia, 86-3000, Costa Rica

* Correspondence: jvegab@gmail.com; jose.vega.baudrit@una.cr (J.R.V.B.); Tel.: +50688934493

**Table S1.** Leading companies producing nanocellulose worldwide (1,2)

| **Company** | **Headquarters** | **Key Strengths** |
| --- | --- | --- |
| Borregaard AS | Norway | Operates one of the world's most technologically advanced biorefineries. Offers a wide variety of nanocellulose types and purity grades. |
| Cellucomp Ltd. | United Kingdom | Curran® is its main nanocellulose-based product. It is a useful additive in construction, automotive, paint, and cosmetics industries, among others. |
| Cellu Force | Canada | Its production capacity makes it one of the leading players in the CNC market, with 300 tons produced per year. |
| FiberLean Technologies GmbH | Germany | High production capacity. It is the global leader in MFC production. Additionally, it has multiple research and development departments. |
| GranBio Technologies | Brazil | One of the main producers in South America. Holds multiple patents related to CNC and CNF. |
| University of Maine | United States | Main CNF producer in the United States, with a production capacity of 360 tons per year. Also has multiple research and development departments. |
| Kruger Inc. | Canada | More than 100 years of experience in renewable energy and biomaterials. FiloCell™ is its main nanocellulose product. |
| Nippon Paper Industries Co. Ltd. | Japan | More than 80 years of experience in biomaterials and the paper industry. Highly focused on packaging and paper segments. Production capacity of 30 tons of CNF per year. |
| Oji Holdings Corporation | Japan | Strong research and development capabilities for CNF. Highly focused on packaging and paper segments. |
| Sheng Quoan Group | China | Large number of departments focused on research and development. Additionally, has more than 40 years of experience in the biomaterials industry. |
| IPG CHEM | China | High production capacity of 1.000 tons per year. Advanced research and development facilities. |
| Stora Enso | Norway and Finland | Focuses on the production of renewable and sustainable materials, including nanocellulose. |

**Table S2.** Prices of CNF and CNC from different suppliers (quoted directly with each producer)

| **Supplier** | **Product** | **Price $/kg** |
| --- | --- | --- |
| Sheng Quoan Group | CNF hydrogel (3% solids) | 25 (minimum order 20 tons) |
| Celluforce | CNC Powder | 50 (mínimum order 5 kg) |
| Celluforce | CNC Powder | 100 |
| University of Maine | CNF hydrogel (3% solids) | 200 |
| University of Maine | CNC hydrogel (11% solids) | 700 |
| Nano Grafi | CNC Powder | 950 |
| Nano Grafi | CNF Powder | 1.000 |
| Powder Nano | CNC Powder | 1.000 |
| Powder Nano | CNF Powder | 1.000 |
| Ecplaza Network Inc | CNF hydrogel (1% solids) | 1.100 |
| Nanomaterial Powder | CNC Powder | 1.200 |
| Nanomaterial Powder | CNF Powder | 1.200 |
| Cellulose Lab | CNF hydrogel (15% solids) | 1.300 |
| Cellulose Lab | CNC hydrogel (6% solids) | 1.600 |

**Table S3.** Detail description of the proposed process

| **Process** | **Description** |
| --- | --- |
| Grinding of pineapple peels | Pineapple peels must initially be pretreated in a mill to be crushed/ground. The main function of this stage is to reduce the particle size for subsequent stages. |
| Alkaline treatment 1 | In an agitated tank at approximately 400 rpm, the ground peels are mixed for 4 h at 80 °C with a 5% (w/v) NaOH aqueous solution at a 1:30 ground peels:solution ratio. The mixture is then centrifuged and washed with water until a neutral pH is reached. Based on the work of Hafemann et al. (3), 45% of the lignocellulosic material is lost during this process. |
| Bleaching treatment 1 | In a tank with agitation at approximately 500 rpm, the material resulting from alkaline treatment 1 is mixed at 35 °C for 2 h with a solution containing 5% (v/v) H2O2 and 0.1% (w/v) MgSO4 at a 1:30 solid material: solution ratio. Then, NaOH is added to the solution (achieving 1% w/v), and the mixture is heated under the same conditions for 22 h. Finally, it is centrifuged and washed with water until the pH reaches neutral. Based on the work of Hafemann et al. (3), an additional 12% of the lignocellulosic material is lost during this process. |
| Bleaching treatment 2 | In an agitated tank at approximately 500 rpm, the material resulting from bleaching treatment 1 is mixed at 45 °C for 2 h with a solution containing 5% (v/v) H2O2 and 0.1% (w/v) MgSO4 at a 1:30 solid material:solution ratio. Then, NaOH is added to the solution (achieving 1% w/v), and the mixture is heated under the same conditions for 22 h. Finally, it is centrifuged and washed with water until the pH reaches neutral. Based on the work of Hafemann et al. (3), an additional 6% of the lignocellulosic material is lost during this process. |
| Alkaline treatment 2 | In a tank with agitation at approximately 400 rpm, the material resulting from bleaching treatment 2 is mixed for 4 h at 80 °C with a 5% (w/v) NaOH aqueous solution at a ratio of 1:30 (ground solid material:solution). The mixture is then centrifuged and washed with water until a neutral pH is reached. Based on the work of Hafemann et al. (3), an additional 18% of the lignocellulosic material is lost during this process. |
| Bleaching treatment 3 | In an agitated tank at approximately 500 rpm, the material resulting from alkaline treatment 2 is mixed at 70 °C for 20 minutes with a solution of 2% (v/v) H2O2 and 0.1% (w/v) MgSO4 at a 1:30 solid material:solution ratio. Then, NaOH is added to the solution (achieving 0.4% w/v), and the mixture is heated under the same conditions for 5 h and 40 minutes. Finally, it is centrifuged and washed with water until the pH reaches neutral. Based on the work of Hafemann et al. (3), an additional 8% of the lignocellulosic material is lost during this process. |
| Fibrillation through high pressure homogenization | The material resulting from bleaching treatment 3 is transferred to a homogenizing tank to be mixed with water and create a 30 g/L emulsion of microcrystalline cellulose. This mixture is then passed through a high-pressure homogenizer at a flow rate of 4400 L/h, ambient temperature, and 60 MPa pressure for 10 cycles. |
| Spray drying | The emulsion resulting from the high-pressure homogenization process is dried using a dryer to produce nanocellulose as a dry powder. |

**Table S4.** Mass balance of the proposed process.

| **Group** | **Balance point** | **Total mass flow** *(kg/day)* | **Pineapple mass flow** *(kg/day)* | **NaOH mass flow** *(kg/day)* | **H2O2 mass flow** *(kg/day)* | **MgSO4 mass flow** *(kg/day)* | **Water mass flow** *(kg/day)* |
| --- | --- | --- | --- | --- | --- | --- | --- |
| **Main process** | **F1** | 387 | 387 | 0 | 0 | 0 | 0 |
| **F2** | 387 | 387 | 0 | 0 | 0 | 0 |
| **F3** | 12.571 | 387 | 580 | 0 | 0 | 11.604 |
| **F4** | 213 | 213 | 0 | 0 | 0 | 0 |
| **F5** | 7.112 | 213 | 64 | 447 | 6,4 | 6.382 |
| **F6** | 187 | 187 | 0 | 0 | 0 | 0 |
| **F7** | 6.258 | 187 | 56 | 393 | 5,6 | 5.616 |
| **F8** | 176 | 176 | 0 | 0 | 0 | 0 |
| **F9** | 5.719 | 176 | 264 | 0 | 0 | 5.279 |
| **F10** | 144 | 144 | 0 | 0 | 0 | 0 |
| **F11** | 4.616 | 144 | 17 | 121 | 4,3 | 4.329 |
| **F12** | 133 | 133 | 0 | 0 | 0 | 0 |
| **F13** | 4.558 | 133 | 0 | 0 | 0 | 4.425 |
| **F14** | 4.558 | 133 | 0 | 0 | 0 | 4.425 |
| **F15** | 4.558 | 133 | 0 | 0 | 0 | 4.425 |
| **F16** | 4.558 | 133 | 0 | 0 | 0 | 4.425 |
| **F17** | 4.558 | 133 | 0 | 0 | 0 | 4.425 |
| **F18** | 133 | 133 | 0 | 0 | 0 | 0 |
| **Raw materials** | **F19** | 12.184 | 0 | 580 | 0 | 0 | 11.604 |
| **F20** | 1.358 | 0 | 0 | 447 | 0 | 912 |
| **F21** | 6 | 0 | 0 | 0 | 6,4 | 0 |
| **F22** | 4.194 | 0 | 0 | 0 | 0 | 4.194 |
| **F23** | 1.340 | 0 | 64 | 0 | 0 | 1.276 |
| **F24** | 1.195 | 0 | 0 | 393 | 0 | 802 |
| **F25** | 6 | 0 | 0 | 0 | 5,6 | 0 |
| **F26** | 3.691 | 0 | 0 | 0 | 0 | 3.691 |
| **F27** | 1.179 | 0 | 56 | 0 | 0 | 1.123 |
| **F28** | 5.543 | 0 | 264 | 0 | 0 | 5.279 |
| **F29** | 369 | 0 | 0 | 121 | 0 | 247 |
| **F30** | 4 | 0 | 0 | 0 | 4,3 | 0 |
| **F31** | 3.735 | 0 | 0 | 0 | 0 | 3.735 |
| **F32** | 364 | 0 | 17 | 0 | 0 | 346 |
| **F33** | 4.558 | 133 | 0 | 0 | 0 | 4.425 |
| **F34** | 981 | 0 | 981 | 0 | 0 | 0 |
| **F35** | 19.629 | 0 | 0 | 0 | 0 | 19.629 |
| **F36** | 20.610 | 0 | 981 | 0 | 0 | 19.629 |
| **F37** | 2.922 | 0 | 0 | 961 | 0 | 1.961 |
| **F38** | 2.922 | 0 | 0 | 961 | 0 | 1.961 |
| **Waste** | **F39** | 12.358 | 174 | 580 | 0 | 0 | 11.604 |
| **F40** | 6.924 | 26 | 64 | 447 | 6,4 | 6.382 |
| **F41** | 6.082 | 11 | 56 | 393 | 5,6 | 5.616 |
| **F42** | 5.311 | 32 | 0 | 0 | 0 | 5.279 |
| **F43** | 4.483 | 12 | 17 | 121 | 4,3 | 4.329 |
| No heating or cooling via heat exchangers is required at any stage of the process; therefore, there is no added value in calculating the enthalpies of the delignification and hemicellulose dissolution reactions. | | | | | | | |

**Table S5.** Equipment sizing

|  | **Code** | **Capacity** | **CostFOB**1 **CostDelivered2** ($) | **Model** | **Description** |
| --- | --- | --- | --- | --- | --- |
| Centrifuges | F-101 | 213 kg/day | 6.800  7.500 | Liaoyang Shenzhou Machinery Equipment Co., Ltd  (HHP140) | Centrifuge used after Alkaline treatment 1. It can work with 140 L, thus allowing working with the daily load of lignocellulosic material to be rinsed and centrifuged. |
| F-102 | 187 kg/day | 6.800  7.500 | Liaoyang Shenzhou Machinery Equipment Co., Ltd  (HHP140) | Centrifuge used after Alkaline treatment 1. It can work with 140 L, thus allowing working with the daily load of lignocellulosic material to be rinsed and centrifuged. |
| F-103 | 176 kg/day | 6.800  7.500 | Liaoyang Shenzhou Machinery Equipment Co., Ltd  (HHP140) | Centrifuge used after Alkaline treatment 1. It can work with 140 L, thus allowing working with the daily load of lignocellulosic material to be rinsed and centrifuged. |
| F-104 | 144 kg/day | 6.800  7.500 | Liaoyang Shenzhou Machinery Equipment Co., Ltd  (HHP140) | Centrifuge used after Alkaline treatment 1. It can work with 140 L, thus allowing working with the daily load of lignocellulosic material to be rinsed and centrifuged. |
| F-105 | 133 kg/day | 6.800  7.500 | Liaoyang Shenzhou Machinery Equipment Co., Ltd  (HHP140) | Centrifuge used after Alkaline treatment 1. It can work with 140 L, thus allowing working with the daily load of lignocellulosic material to be rinsed and centrifuged. |
| Reaction and solubilization tanks | K-101 | 12.600 kg/day | 5.000  5.500 | Zhejiang L&b Machinery Co., Ltd. (12.000 L) | A mixing tank with heating capacity is used in Alkaline treatment 1 to mix the reagents with the lignocellulosic material at a specified temperature. It can handle 12.000 L, thus allowing for the daily load. |
| K-102 | 7.110 kg/day | 2.000  2.200 | Shanghai Kaiquan Machine Valve Co., Ltd.  (10.000 L) | A mixing tank with heating capacity is used in Bleaching Treatment 1 to mix the reagents with the lignocellulosic material at a specified temperature. It can handle 10.000 L, thus allowing for the daily load. |
| K-103 | 6.260 kg/day | 2.000  2.200 | Shanghai Kaiquan Machine Valve Co., Ltd.  (10.000 L) | A mixing tank with heating capacity is used in Bleaching treatment 2 to mix the reagents with the lignocellulosic material at a specified temperature. It can handle 10.000 L, thus allowing for the daily load. |
| K-104 | 5.720 kg/day | 2.000  2.200 | Shanghai Kaiquan Machine Valve Co., Ltd.  (10.000 L) | A mixing tank with heating capacity is used in Alkaline treatment 2 to mix the reagents with the lignocellulosic material at a specified temperature. It can handle 10.000 L, thus allowing for the daily load. |
| K-105 | 4.620 kg/day | 2.000  2.200 | Shanghai Kaiquan Machine Valve Co., Ltd.  (10.000 L) | A mixing tank with heating capacity is used in Bleaching treatment 3 to mix the reagents with the lignocellulosic material at a specified temperature. It can handle 10.000 L, thus allowing for the daily load. |
| K-106 | 4.690 kg/day | 2.000  2.200 | Shanghai Kaiquan Machine Valve Co., Ltd.  (10000 L) | Mixing tank for emulsifying the microcrystalline cellulose produced. It can handle 10.000 L, thus allowing for the daily load. |
| K-107 | 20.600 kg/day | 6.800  7.500 | Wenzhou Compass Machinery Co., Ltd. (4000L) | An agitation tank for solubilizing NaOH and storing it. It can work with 30.000 L, thus allowing the preparation of the solutions used daily. |
| K-108 | 2.920 kg/day | 20.000  22.000 | Shanghai Kaiquan Machine Valve Co., Ltd.  (20000 L) | Storage tank for 35% (v/v) hydrogen peroxide. This requires refilling after each production batch. Heating is not required. It can store 20.000 L, thus allowing working with the daily load. |
| Drying | T-101 | 4.560 kg/day | 13.600  15.000 | Jiangsu Yutong Drying Engineering Co., Ltd. (ZPG-300) | A spray dryer is used to obtain the produced nanocellulose as a dry powder. It has a drying capacity of 300 kg/h, which allows drying the daily production. |
| PLCs | X-101 | N/A | 165  200 | Shenzhen Coolmay Technology Co., Ltd. (RS485) | Programmable Logic Controls that control the valve and pump systems that supply the tanks (K-101 to K-108) with the various reagents and solvents used in the process. The design of this fluid system will not be covered in this work, but it is included here as it is considered in the project costing. |
| X-102 | N/A | 165  200 |
| Mill | Z-101 | 387 kg/day | 3.600  4.000 | Zhengzhou Leabon Machinery Equipment Co., Ltd. (9FQ 360-20) | Mill used in the first stage of the process to reduce the particle size of the pineapple peels. It can handle 500 kg/h, thus allowing operation at the daily load. |
| Fibrillator | Z-102 | 4.560 kg/L | 17.000  18.700 | SHANGHAI DONGHUA (Modelo GYB8000-1.5S) | High-pressure homogenization equipment for the fibrillation of the microcrystalline cellulose. It has a capacity up to 8000 L/h with a max pressure of 60 MPa. This allows processing 4.560 kg of 30 g/L solution daily within 24 hours, using a maximum of 24 fibrillation cycles. |
| 1 Free On Board prices quoted in 2024  2 Estimated by increasing 10% of the FOB price (4,5). | | | | | |

**Table S6.** Correction factors and their assigned values for the estimation of TFI, FCI, and WC by the method established by Smith for a plant processing mostly fluids (4).

| **Correction factor** | | **Values** |
| --- | --- | --- |
| *fm* | Material | 1 |
| *fp* | Pressure | 1 |
| *ft* | Temperature | 1 |
| *fpip* | Piping | 0.7 |
| *fer* | Equipment erection | 0.4 |
| *finst* | Instruments and controls | 0.2 |
| *felec* | Electrical | 0.1 |
| *futil* | Utilities | 0.5 |
| *fos* | Off-sites | 0.2 |
| *fbuild* | Buildings | 0.2 |
| *fsp* | Site preparation | 0.1 |
| *fdec* | Design, engineering, and construction | 1 |
| *fcont* | Contingency | 0.4 |
| *fwt* | Working capital | 0.7 |

**Table S7.** Estimation of TCI according to the method described by Smith (4).

|  | | |
| --- | --- | --- |
| **Equipment code** | **Contribution calculation** | **Contribution to TCI** ($) |
| F-101 | Thus, each piece of equipment contributes by | 41.300 |
| F-102 |  | 41.300 |
| F-103 |  | 41.300 |
| F-104 |  | 41.300 |
| F-105 |  | 41.300 |
| K-101 |  | 30.300 |
| K-102 |  | 12.100 |
| K-103 |  | 12.100 |
| K-104 |  | 12.100 |
| K-105 |  | 12.100 |
| K-106 |  | 12.100 |
| K-107 |  | 41.300 |
| K-108 |  | 121.000 |
| T-101 |  | 82.500 |
| X-101 |  | 1.100 |
| X-102 |  | 1.100 |
| Z-101 |  | 22.000 |
| Z-102 |  | 102.900 |
| **TCI = $669.200** | | |

**Table S8.** Estimation of FCI according to the method described by Smith (4).

|  | | |
| --- | --- | --- |
| **Equipment code** | **Contribution calculation** | **Contribution to FCI** ($) |
| F-101 | Thus, each piece of equipment contributes by | 36.000 |
| F-102 |  | 36.000 |
| F-103 |  | 36.000 |
| F-104 |  | 36.000 |
| F-105 |  | 36.000 |
| K-101 |  | 26.400 |
| K-102 |  | 10.600 |
| K-103 |  | 10.600 |
| K-104 |  | 10.600 |
| K-105 |  | 10.600 |
| K-106 |  | 10.600 |
| K-107 |  | 36.000 |
| K-108 |  | 105.600 |
| T-101 |  | 72.000 |
| X-101 |  | 1.000 |
| X-102 |  | 1.000 |
| Z-101 |  | 19.200 |
| Z-102 |  | 89.800 |
| **FCI = $584.000** | | |

**Section S1.** Estimation of COM

*Section S1.1. Estimation of raw material cost, CRM*

The estimate is based on how much raw material is needed for year-round production and how much it costs. The cost is based on a direct quotation from a supplier (FOB) plus 10% for estimating the delivered cost (4).

| **Raw material** | **Flux** (kg/year) | **Price** ($/kg) | **Cost** ($/year) | **Supplier** |
| --- | --- | --- | --- | --- |
| Pineapple peel | 140.000 |  | 29.200 | Local pineapple producers |
| NaOH (s) | 358.200 | 0,44 | 157.700 | Hunan Mingray Trade Co., Ltd. |
| H2O2 (35% v/v) | 1.066.700 | 0,42 | 445.900 | CAMACHEM |
| MgSO4 (s) | 5.959 | 0,11 | 700 | CAMACHEM |
| CRM = 633.500 $/year | | | | |

In the case of the pineapple peel, the cost is estimated at 4 times the cost of transporting the peel from the fields to the processing plant. The transportation cost of transporting the 140 annual tons was estimated using the study by Blanco (2005) (6) as a reference, which provides recommendations for the cost per kilometer of transportation for the San Carlos transport association. In 2005, the cost was CRC 464.93 per kilometer. To obtain a value for 2024, Equation S1 is used (4), where *Vx* stands for the final and initial value, and *CPIx* is the final and initial consumer price index. Thus, using the CPI values from the Banco de Costa Rica for 2005 and 2024 (52,24 and 109,5, respectively), a value of 974,2 CRC per kilometer is obtained. In USD, this value is equivalent to 1,87 $/km. Therefore, it is estimated that ideally, approximately two weekly trips should be made, with each truck transporting around 1350 kg of pineapple peel to meet the daily requirements for an annual production of 48 tons. Given the chosen location, the total distance (round trip) would be approximately 50 km per trip, totaling 100 km per week, which is equivalent to 5.200 km per year and $9.724. Then four times this cost is $29.200.

(Equation S1)

*Section S1.2. Estimation of waste treatment cost, CWT*

The cost of waste treatment for this project is considered to be $0, since the selected free zone provides this service at no additional cost for companies operating within it (7).

*Section S1.3. Estimation of Auxiliary services cost, CUT*

The electrical costs per piece of equipment are shown below.

| **Equipment code** | **Power** (kW) | **Daily use** (h) | **Yearly electric consumption** (kWh) |
| --- | --- | --- | --- |
| F-101 | 5,5 | 3 | 6.022 |
| F-102 | 5,5 | 3 | 6.022 |
| F-103 | 5,5 | 3 | 6.022 |
| F-104 | 5,5 | 3 | 6.022 |
| F-105 | 5,5 | 3 | 6.022 |
| K-101 | 5,5 | 4 | 8.030 |
| K-102 | 5,5 | 24 | 48.180 |
| K-103 | 5,5 | 24 | 48.180 |
| K-104 | 5,5 | 4 | 8.030 |
| K-105 | 5,5 | 6 | 12.045 |
| K-106 | 0,55 | 2 | 402 |
| K-107 | 7,5 | 3 | 8.212 |
| T-101 | 330 | 24 | 2.890.800 |
| Z-101 | 5,5 | 2 | 4.015 |
| Z-102 | 45 | 10 | 164.250 |
| Total electric consumption for the process 3.222.254 kWh/year | | | |

To estimate electricity consumption costs, the Costa Rican Electricity Institute (ICE) T-IN (industrial) rate for monthly consumption exceeding 3000 kWh (October 2023) will be used, which is CRC 110.26/kWh. The annual cost is CRC 355.290.000, equivalent to $684.560/year.

The annual water consumption is estimated below. The estimate uses the business tariff from Acuaductos y Alcantarillados (AyA) as of October 2023.

| **Annual consumption** | **Service cost** | **Cost in CRC** | **Cost in USD** |
| --- | --- | --- | --- |
| 13.737 m3 | 1.970 CRC/m3 | CRC 27.060.000 per year | $52.080/year |

A total value of *CUT* is then estimated as $736.700 per year.

*Section S1.4. Estimation of labor cost, COL*

The method described by Silla (8) was used to determine the operational labor. This method uses Equation S2, where: *L,* is operational labor; N, number of unit operations (15); p, annual productivity increase (0,02); k, productivity factor (0,401 for a batch process); ɳ, number of years since 1952 (72 years until 2024); m, plant capacity (5,53 kg/h); and b, exponent dependent on plant capacity (0,76 for batch processes below 5670 kg/h).

(Equation S2)

Therefore, for the desired annual production volume of 48.000 kg of nanocellulose, 18.900 hours of work are required, which is equivalent to 51.8 h/day. Then the number of operators can be estimated using Equation S3.

(Equation S3)

Thus, a reasonable number of operators is 8 employes, distributed as 6 full-time shift operators and 2 others with part-time shifts in compliance with the Costa Rican Labor Code. The workers can be distributed in as shown below to meet the production demand of the proposed plant.

| **Day** | **Operator**  **1**  (full-time) | **Operator**  **2**  (full-time) | **Operator 3**  (full-time) | **Operator**  **4**  (full-time) | **Operator**  **5**  (full-time) | **Operator**  **6**  (full-time) | **Operator**  **7**  (part-time) | **Operator**  **8**  (part-time) |
| --- | --- | --- | --- | --- | --- | --- | --- | --- |
| Monday | 6am-2pm | 6am-2pm | 2pm-10pm | 2pm-10pm | 10am-4am | 12am-6am |  |  |
| Tuesday | 6am-2pm | 6am-2pm | 2pm-10pm | 2pm-10pm | 10am-4am | 12am-6am |  |  |
| Wednesday | 6am-2pm | 6am-2pm | 2pm-10pm | 2pm-10pm | 10am-4am | 12am-6am |  |  |
| Thursday | 6am-2pm |  | 2pm-10pm | 2pm-10pm | 10am-4am | 12am-6am |  | 6am-2pm |
| Friday |  | 6am-2pm | 2pm-10pm |  | 10am-4am | 12am-6am | 6am-2pm | 2pm-10pm |
| Saturday | 6am-2pm | 6am-2pm |  | 2pm-10pm | 10am-4am |  | 2pm-10pm | 10am-6am |
| Sunday | 6am-2pm | 6am-2pm | 2pm-10pm | 2pm-10pm |  | 12am-6am | 10am-4am |  |

Additionally, the presence of administrative personnel with engineering backgrounds is recommended to support plant operations. For this purpose, it is assumed that one process engineer working during the morning shift will be sufficient. The associated labor cost is estimated using minimum wage data from the Ministry of Labor and Social Security, as shown below.

| **Category** | **Number of employes** | **Social security contribution factor1** | **Minimum wage**  (CRC/month) | **Proposed salary**  (CRC/month) | **Cost**  (CRC/year) | **Cost**  (USD/year) |
| --- | --- | --- | --- | --- | --- | --- |
| Operator  (full-time) | 6 | 1,4807 | 463.249 | 520.000 | 55.437.408 | 106.692 |
| Operator  (part-time) | 2 | 1,4807 | 231.625 | 260.000 | 9.239.568 | 17.782 |
| Chemical engineer  (full-time) | 1 | 1,4807 | 638.299 | 820.000 | 14.570.088 | 28.041 |
| COL = $152.600/year | | | | | | |
| 1Social security contribution is estimated as there is contribution for: 26.67% of public health insurances; 8,33%, end of year bonus; 3,46%, accident insurance; 3,39%, holidays; and 6,22%, layoff. This totals in 48,07%. | | | | | | |

**Section S2.** Financial analysis

*Section S2.1. Net profit estimation*

The yearly net profit was calculated as follows. The yearly income was estimated by multiplying the annual production by the selling price (Eq. S4) (this assumes that the produced product is sold).

(Eq. S4)

Subsequently, the gross profit is estimated as

(Eq. S5)

Then taxes and depreciation must be subtracted from gross profit to estimate net profit. In the case of taxation, there is none, since the project is taking place in a Free Trade Zone and lasts only 10 years. As for depreciation, it can be calculated as shown in Eq. S6, where the FCI, minus the salvage value (in this case considered as $0), is divided by the length of the project, assuming a linear depreciation across time.

(Eq. S6)

Then, the net profit is simply estimated as

(Eq. S7)

By substituting Eq. S4-S6 into Eq. S7, the yearly net profit can be estimated as

(Eq. S8)

*Section S2.2. Cash flow and estimation of financial indicators*

The cash flow over the 10-year project is shown below using the selected selling price of $75/kg. The cash flow considers the present value of money. This is estimated as described in Eq. S9 where *i* is the fractional interest rate, and n is the number of years that have passed. The sum of the present value across the length of the project is the Net Present Value (NPV) (Eq. S10)

| **Year** | **0** | **1** | **2** | **3** | **4** | **5** |
| --- | --- | --- | --- | --- | --- | --- |
| **Initial investment (TCI + Land)** ($) | -2.169.200 |  |  |  |  |  |
| **Net profit** ($) |  | 1.276.100 | 1.276.100 | 1.276.100 | 1.276.100 | 1.276.100 |
| **Depreciation** ($) |  | 58.400 | 58.400 | 58.400 | 58.400 | 58.400 |
| **Salvage value** ($) |  |  |  |  |  |  |
| **WC recovery** ($) |  |  |  |  |  |  |
| **Selling land** ($ - not depreciable) |  |  |  |  |  |  |
| **Cash flow** ($) | -2.169.200 | 1.334.500 | 1.334.500 | 1 334.500 | 1.334.500 | 1.334.500 |
| **Present value** (i: 0,125) ($) | -2169.200 | 1.186.222 | 1.054.420 | 937.262 | 833.122 | 740.553 |

| **Year** | **6** | **7** | **8** | **9** | **10** |
| --- | --- | --- | --- | --- | --- |
| **Initial investment (TCI + Land)** ($) |  |  |  |  |  |
| **Net profit** ($) | 1.276.100 | 1.276.100 | 1276.100 | 1.276.100 | 1.276.100 |
| **Depreciation** ($) | 58.400 | 58.400 | 58.400 | 58.400 | 58.400 |
| **Salvage value** ($) |  |  |  |  | 0 |
| **WC recovery** ($) |  |  |  |  | 85.200 |
| **Selling land** ($ - not depreciable) |  |  |  |  | **1.500.000** |
| **Cash flow** ($) | 1.334.500 | 1.334.500 | 1.334.500 | 1.334.500 | 2.919.700 |
| **Present value** (i: 0,125) ($) | 658.269 | 585.128 | 520.114 | 462.323 | 1.937.191 |

(Eq. S9)

(Eq. S10)

The Internal Rate of Return (IRR) is estimated by numerically solving Eq. S10, changing the value of *i* (in this case, *i* would be the IRR and not the fractional interest rate) so that NPV is 0.

The other two financial indicators estimated in this work are the Return on Investment (ROI) and the Payback time. These two parameters do not account for the present value of capital and are calculated as follows. The ROI is estimated as the ratio between the average yearly income and the total initial investment

(Eq. S11)

The Payback time is simply estimated as time that takes the recover the total initial investment (Eq. S12)

(Eq. 12)

**References**

1. Bhattacharya A. Top 10 Nanocellulose Companies in the World [Internet]. 2022. Available from: https://www.imarcgroup.com/top-nanocellulose-companies

2. Markets M and Nanocellulose Market by Type (MFC & NFC, CNC/NCC), Raw Material (Wood, Non-Wood), Application (Pulp & Paper, Composites, Biomedical & Pharmaceuticals, Electronics & Sensors), and Region ( North America, APAC, Europe, Row) - Global Forecast to 2026. [Internet]. 2022. Available from: https://www.marketsandmarkets.com/Market-Reports/nano-cellulose-market-56392090.html

3. Hafemann E, Battisti R, Bresolin D, Marangoni C, Machado RAF. Enhancing Chlorine ‑ Free Purification Routes of Rice Husk Biomass Waste to Obtain Cellulose Nanocrystals. Waste and Biomass Valorization [Internet]. 2020;11:6595–611. Available from: https://doi.org/10.1007/s12649-020-00937-2

4. Smith R. Chemical Process Design and Integration. 1st ed. John Wiley & Sons, Ltd; 2005.

5. Peters MS, Timmerhaus KD, West RE. Plant Design and Economics for Chemical Engineers. 5th ed. McGraw-Hill Education; 2003.

6. Blanco LA. Estructura de costos de la Asociación de Transportistas de San Carlos (ASTRANSCA). Instituto Tecnológico de Costa Rica; 2005.

7. Muelle Free Zone. Muelle Free Zone [Internet]. 2023. Available from: https://muellefz.com/

8. Silla H. Chemical Process Engineering. CRC Press. Marcel Dekker; 2003.
